# Supplementary material
Source: Research Square preprint supplement (doi:10.21203/rs.3.rs-8052062/v1)
Supplement: Supplementary file 2 [file ecb872f5e8eec85d6fd047ea.xlsx]

## Sheet: Source Data
	Optimizing Preprocessing for Urinary Cell-Free DNA Preservation Centrifugation, EDTA Concentration, Storage and Thawing Strategies
	Wenjing Li, Zongning Zhou, Cong Zou, Yan Fu, Xin Zhang, Shenjuan Li, Zhangyan Zhou, Kaiyu Qian, Hongwei Peng, Shanshan Zhang
	Source data of main figures
		Figure 1B						Figure 2B						Figure 3B,3H						Figure 5A,5G						Figure 6B,6C
		Sample ID	Groups	TDNA Yield (pg/mL)	ucfDNA Yield (pg/mL)	cfDNA score (cfDNA%)		Sample ID	Groups	TDNA Yield (pg/mL)	ucfDNA Yield (pg/mL)	cfDNA score (cfDNA%)		Sample ID	Groups	TDNA Yield (pg/mL)	ucfDNA Yield (pg/mL)	cfDNA score (cfDNA%)		Sample ID	Groups	TDNA Yield (pg/mL)	ucfDNA Yield (pg/mL)	cfDNA score (cfDNA%)		Sample ID	Groups	TDNA Yield (pg/mL)	ucfDNA Yield (pg/mL)	cfDNA score (cfDNA%)
		1-1	Baseline	1790	1120	62.89		1-1	Baseline	2290	1450	63.33		1-1	Baseline	2300	1350	58.68		1-1	Baseline	2300	1350	58.68		1-1	Baseline	2600	1700	65.59
		1-2	Baseline	1710	1020	59.84		1-2	Baseline	2080	1360	65.45		1-2	Baseline	2325	1400	60.19		1-2	Baseline	2325	1400	60.19		1-2	Baseline	3157.14	2128.57	67.41
		1-3	Baseline	1850	1140	61.79		1-3	Baseline	2200	1440	65.36		1-3	Baseline	2050	1197.5	58.53		1-3	Baseline	2050	1197.5	58.53		1-3	Baseline	3242.86	2114.29	65.32
		2-1	0 mM EDTA-treated WU stored at RT for 1 day	809	1.82	0.22		2-1	0 mM EDTA-treated US stored at RT for 1 day	375	84.8	22.59		2-1	FWU thawed at 4℃ for 16 hours	866.25	620	71.66		13-1	10 mM EDTA-treated FWU thawed at 4℃ for 16 hours	1518.75	386.438	25.48		2-1	10 mM EDTA-treated FUS stored at -20℃ for 1 month	3014.29	1985.71	65.74
		2-2	0 mM EDTA-treated WU stored at RT for 1 day	842	23.7	2.81		2-2	0 mM EDTA-treated US stored at RT for 1 day	462	135	29.32		2-2	FWU thawed at 4℃ for 16 hours	711.25	502.5	70.73		13-2	10 mM EDTA-treated FWU thawed at 4℃ for 16 hours	1250	482.5	38.51		2-2	10 mM EDTA-treated FUS stored at -20℃ for 1 month	2928.57	1985.71	67.57
		2-3	0 mM EDTA-treated WU stored at RT for 1 day	881	63.8	7.25		2-3	0 mM EDTA-treated US stored at RT for 1 day	467	126	26.94		2-3	FWU thawed at 4℃ for 16 hours	623.75	428.75	68.8		13-3	10 mM EDTA-treated FWU thawed at 4℃ for 16 hours	1700	637.5	37.36		2-3	10 mM EDTA-treated FUS stored at -20℃ for 1 month	3128.57	2042.86	65.17
		3-1	0 mM EDTA-treated WU stored at RT for 3 days	Marker(s) not detected; Caution! %cfDNA Edited (Region changed)				3-1	0 mM EDTA-treated US stored at RT for 3 days	Marker(s) not detected; Caution! %cfDNA Edited (Region changed)				3-1	FWU thawed at RT (18–20℃) for 3.5 hours	1812.5	1487.5	82.47		14-1	10 mM EDTA-treated FWU thawed at RT (18–20℃) for 3.5 hours	5575	2137.5	38.38		3-1	10 mM EDTA-treated FUS stored at -20℃ for 2 months	652.857	382.857	58.7
		3-2	0 mM EDTA-treated WU stored at RT for 3 days					3-2	0 mM EDTA-treated US stored at RT for 3 days					3-2	FWU thawed at RT (18–20℃) for 3.5 hours	1712.5	1475	85.88		14-2	10 mM EDTA-treated FWU thawed at RT (18–20℃) for 3.5 hours	6362.5	2400	37.84		3-2	10 mM EDTA-treated FUS stored at -20℃ for 2 months	544.286	332.857	61.24
		3-3	0 mM EDTA-treated WU stored at RT for 3 days					3-3	0 mM EDTA-treated US stored at RT for 3 days					3-3	FWU thawed at RT (18–20℃) for 3.5 hours	1687.5	1412.5	84.07		14-3	10 mM EDTA-treated FWU thawed at RT (18–20℃) for 3.5 hours	5787.5	2162.5	37.47		3-3	10 mM EDTA-treated FUS stored at -20℃ for 2 months	590	362.857	61.51
		4-1	0 mM EDTA-treated WU stored at RT for 7 days	Marker(s) not detected; Caution! %cfDNA Edited (Region changed)				4-1	0 mM EDTA-treated US stored at RT for 7 days	Marker(s) not detected; Caution! %cfDNA Edited (Region changed)				4-1	FWU thawed at 37℃ for approximately 15 minutes	2025	1562.5	77.31		15-1	10 mM EDTA-treated FWU thawed at 37℃ for approximately 15 minutes	5837.5	2187.5	37.46		5-1	10 mM EDTA-treated FUS stored at -80℃ for 1 month	2971.43	1942.86	65.38
		4-2	0 mM EDTA-treated WU stored at RT for 7 days					4-2	0 mM EDTA-treated US stored at RT for 7 days					4-2	FWU thawed at 37℃ for approximately 15 minutes	1900	1462.5	77.34		15-2	10 mM EDTA-treated FWU thawed at 37℃ for approximately 15 minutes	7012.5	2612.5	37.33		5-2	10 mM EDTA-treated FUS stored at -80℃ for 1 month	2800	1857.14	66.04
		4-3	0 mM EDTA-treated WU stored at RT for 7 days					4-3	0 mM EDTA-treated US stored at RT for 7 days					4-3	FWU thawed at 37℃ for approximately 15 minutes	1750	1335.94	76.27		15-3	10 mM EDTA-treated FWU thawed at 37℃ for approximately 15 minutes	9275	2400	25.85		5-3	10 mM EDTA-treated FUS stored at -80℃ for 1 month	2700	1842.86	68.35
																										6-1	10 mM EDTA-treated FUS stored at -80℃ for 2 months	3071.43	2114.29	69.1
		Figure 1C,1F						Figure 2C,2F						Figure 3C,3I						Figure 5B,5H						6-2	10 mM EDTA-treated FUS stored at -80℃ for 2 months	2685.71	1785.71	66.59
		Sample ID	Groups	TDNA Yield (pg/mL)	ucfDNA Yield (pg/mL)	cfDNA score (cfDNA%)		Sample ID	Groups	TDNA Yield (pg/mL)	ucfDNA Yield (pg/mL)	cfDNA score (cfDNA%)		Sample ID	Groups	TDNA Yield (pg/mL)	ucfDNA Yield (pg/mL)	cfDNA score (cfDNA%)		Sample ID	Groups	TDNA Yield (pg/mL)	ucfDNA Yield (pg/mL)	cfDNA score (cfDNA%)		6-3	10 mM EDTA-treated FUS stored at -80℃ for 2 months	2657.14	1800	67.71
		1-1	Baseline	1790	1120	62.89		1-1	Baseline	2290	1450	63.33		1-1	Baseline	2300	1350	58.68		1-1	Baseline	2300	1350	58.68		7-1	10 mM EDTA-treated FUS stored at -80℃ for 3 months	3042.86	2128.57	69.97
		1-2	Baseline	1710	1020	59.84		1-2	Baseline	2080	1360	65.45		1-2	Baseline	2325	1400	60.19		1-2	Baseline	2325	1400	60.19		7-2	10 mM EDTA-treated FUS stored at -80℃ for 3 months	3357.14	2314.29	68.98
		1-3	Baseline	1850	1140	61.79		1-3	Baseline	2200	1440	65.36		1-3	Baseline	2050	1197.5	58.53		1-3	Baseline	2050	1197.5	58.53		7-3	10 mM EDTA-treated FUS stored at -80℃ for 3 months	2885.71	2042.86	70.87
		5-1	5 mM EDTA-treated WU stored at RT for 1 day	1330	580	43.57		5-1	5 mM EDTA-treated US stored at RT for 1 day	1760	1190	67.43		5-1	FUS thawed at 4℃ for 16 hours	1923.75	1491.75	77.74		16-1	10 mM EDTA-treated FUS thawed at 4℃ for 16 hours	2162.5	1250	58.11
		5-2	5 mM EDTA-treated WU stored at RT for 1 day	1640	656	40.11		5-2	5 mM EDTA-treated US stored at RT for 1 day	1710	1100	64.3		5-2	FUS thawed at 4℃ for 16 hours	2000	1587.5	79.51		16-2	10 mM EDTA-treated FUS thawed at 4℃ for 16 hours	2100	1218.75	58.16		Figure 6D
		5-3	5 mM EDTA-treated WU stored at RT for 1 day	1110	456	41.03		5-3	5 mM EDTA-treated US stored at RT for 1 day	1980	1250	63.5		5-3	FUS thawed at 4℃ for 16 hours	1850	1512.5	82.12		16-3	10 mM EDTA-treated FUS thawed at 4℃ for 16 hours	2187.5	1236.25	56.54		Sample ID	Groups	TDNA Yield (pg/mL)	ucfDNA Yield (pg/mL)	cfDNA score (cfDNA%)
		8-1	10 mM EDTA-treated WU stored at RT for 1 day	1500	619	41.21		8-1	10 mM EDTA-treated US stored at RT for 1 day	1910	1230	64.53		6-1	FUS thawed at RT (18–20℃) for 3.5 hours	2075	1625	78.7		17-1	10 mM EDTA-treated FUS thawed at RT (18–20℃) for 3.5 hours	2187.5	1312.5	60.16		1-1	Baseline	2600	1700	65.59
		8-2	10 mM EDTA-treated WU stored at RT for 1 day	2290	880	38.37		8-2	10 mM EDTA-treated US stored at RT for 1 day	2490	1590	63.9		6-2	FUS thawed at RT (18–20℃) for 3.5 hours	1800	1537.5	85.19		17-2	10 mM EDTA-treated FUS thawed at RT (18–20℃) for 3.5 hours	2475	1487.5	60.24		1-2	Baseline	3157.14	2128.57	67.41
		8-3	10 mM EDTA-treated WU stored at RT for 1 day	1560	541	34.68		8-3	10 mM EDTA-treated US stored at RT for 1 day	2720	1670	61.52		6-3	FUS thawed at RT (18–20℃) for 3.5 hours	2150	1687.5	78.39		17-3	10 mM EDTA-treated FUS thawed at RT (18–20℃) for 3.5 hours	1662.5	985	59.22		1-3	Baseline	3242.86	2114.29	65.32
		11-1	20 mM EDTA-treated WU stored at RT for 1 day	2110	860	40.71		11-1	20 mM EDTA-treated US stored at RT for 1 day	2450	1540	62.76		7-1	FUS thawed at 37℃ for approximately 15 minutes	1812.5	1350	74.27		18-1	10 mM EDTA-treated FUS thawed at 37℃ for approximately 15 minutes	2300	1350	58.8		4-1	10 mM EDTA-treated FUS stored at -20℃ for 3 months	71.1429	52.5714	73.74
		11-2	20 mM EDTA-treated WU stored at RT for 1 day	1790	796	44.59		11-2	20 mM EDTA-treated US stored at RT for 1 day	2520	1590	63.04		7-2	FUS thawed at 37℃ for approximately 15 minutes	2025	1550	76.38		18-2	10 mM EDTA-treated FUS thawed at 37℃ for approximately 15 minutes	2325	1400	60.44		4-2	10 mM EDTA-treated FUS stored at -20℃ for 3 months	43.4286	30.5714	70.27
		11-3	20 mM EDTA-treated WU stored at RT for 1 day	1890	748	39.56		11-3	20 mM EDTA-treated US stored at RT for 1 day	2300	1440	62.7		7-3	FUS thawed at 37℃ for approximately 15 minutes	2012.5	1462.5	72.8		18-3	10 mM EDTA-treated FUS thawed at 37℃ for approximately 15 minutes	2350	1400	59.98		4-3	10 mM EDTA-treated FUS stored at -20℃ for 3 months	74	55.5714	75.22
		14-1	40 mM EDTA-treated WU stored at RT for 1 day	2580	1030	39.99		14-1	40 mM EDTA-treated US stored at RT for 1 day	1440	887	61.42
		14-2	40 mM EDTA-treated WU stored at RT for 1 day	3050	996	32.68		14-2	40 mM EDTA-treated US stored at RT for 1 day	1650	979	59.32		Figure 3D,3J						Figure 5C,5I
		14-3	40 mM EDTA-treated WU stored at RT for 1 day	2570	945	36.82		14-3	40 mM EDTA-treated US stored at RT for 1 day	1540	977	63.36		Sample ID	Groups	TDNA Yield (pg/mL)	ucfDNA Yield (pg/mL)	cfDNA score (cfDNA%)		Sample ID	Groups	TDNA Yield (pg/mL)	ucfDNA Yield (pg/mL)	cfDNA score (cfDNA%)
														1-1	Baseline	2300	1350	58.68		1-1	Baseline	2300	1350	58.68
		Figure 1D,1G						Figure 2D,2G						1-2	Baseline	2325	1400	60.19		1-2	Baseline	2325	1400	60.19
		Sample ID	Groups	TDNA Yield (pg/mL)	ucfDNA Yield (pg/mL)	cfDNA score (cfDNA%)		Sample ID	Groups	TDNA Yield (pg/mL)	ucfDNA Yield (pg/mL)	cfDNA score (cfDNA%)		1-3	Baseline	2050	1197.5	58.53		1-3	Baseline	2050	1197.5	58.53
		1-1	Baseline	1790	1120	62.89		1-1	Baseline	2290	1450	63.33		8-1	FUSS thawed at 4℃ for 16 hours	28.5	12.3125	43.12		19-1	10 mM EDTA-treated FUSS thawed at 4℃ for 16 hours	206.25	167.5	81.17
		1-2	Baseline	1710	1020	59.84		1-2	Baseline	2080	1360	65.45		8-2	FUSS thawed at 4℃ for 16 hours	40.375	26.125	64.76		19-2	10 mM EDTA-treated FUSS thawed at 4℃ for 16 hours	333.75	233.75	69.9
		1-3	Baseline	1850	1140	61.79		1-3	Baseline	2200	1440	65.36		8-3	FUSS thawed at 4℃ for 16 hours	135	85.875	63.8		19-3	10 mM EDTA-treated FUSS thawed at 4℃ for 16 hours	538.75	376.25	69.76
		6-1	5 mM EDTA-treated WU stored at RT for 3 days	1940	710	36.52		6-1	5 mM EDTA-treated US stored at RT for 3 days	1970	1300	66.13		9-1	FUSS thawed at RT (18–20℃) for 3.5 hours	272.5	168.75	62.04		20-1	10 mM EDTA-treated FUSS thawed at RT (18–20℃) for 3.5 hours	2087.5	1325	63.49
		6-2	5 mM EDTA-treated WU stored at RT for 3 days	1780	540	30.37		6-2	5 mM EDTA-treated US stored at RT for 3 days	1830	1280	70.16		9-2	FUSS thawed at RT (18–20℃) for 3.5 hours	368.75	333.75	90.59		20-2	10 mM EDTA-treated FUSS thawed at RT (18–20℃) for 3.5 hours	2137.5	1412.5	65.7
		6-3	5 mM EDTA-treated WU stored at RT for 3 days	1680	627	37.38		6-3	5 mM EDTA-treated US stored at RT for 3 days	1880	1310	69.48		9-3	FUSS thawed at RT (18–20℃) for 3.5 hours	242.5	213.75	88.22		20-3	10 mM EDTA-treated FUSS thawed at RT (18–20℃) for 3.5 hours	2025	1262.5	62.47
		9-1	10 mM EDTA-treated WU stored at RT for 3 days	2580	889	34.46		9-1	10 mM EDTA-treated US stored at RT for 3 days	2270	1480	65.29		10-1	FUSS thawed at 37℃ for approximately 15 minutes	851.389	731.944	86.02		21-1	10 mM EDTA-treated FUSS thawed at 37℃ for approximately 15 minutes	2187.5	1337.5	61.51
		9-2	10 mM EDTA-treated WU stored at RT for 3 days	3340	1150	34.42		9-2	10 mM EDTA-treated US stored at RT for 3 days	2310	1530	66.12		10-2	FUSS thawed at 37℃ for approximately 15 minutes	946.25	817.5	86.39		21-2	10 mM EDTA-treated FUSS thawed at 37℃ for approximately 15 minutes	2037.5	1275	62.81
		9-3	10 mM EDTA-treated WU stored at RT for 3 days	2440	824	33.72		9-3	10 mM EDTA-treated US stored at RT for 3 days	2210	1400	63.1		10-3	FUSS thawed at 37℃ for approximately 15 minutes	958.5	820.125	85.44		21-3	10 mM EDTA-treated FUSS thawed at 37℃ for approximately 15 minutes	1887.5	1176.25	62.27
		12-1	20 mM EDTA-treated WU stored at RT for 3 days	3350	660	19.71		12-1	20 mM EDTA-treated US stored at RT for 3 days	2290	1420	62.27
		12-2	20 mM EDTA-treated WU stored at RT for 3 days	3630	846	23.32		12-2	20 mM EDTA-treated US stored at RT for 3 days	1800	1100	60.9		Figure 3E						Figure 5D
		12-3	20 mM EDTA-treated WU stored at RT for 3 days	2880	739	25.69		12-3	20 mM EDTA-treated US stored at RT for 3 days	1640	992	60.65		Sample ID	Groups	TDNA Yield (pg/mL)	ucfDNA Yield (pg/mL)	cfDNA score (cfDNA%)		Sample ID	Groups	TDNA Yield (pg/mL)	ucfDNA Yield (pg/mL)	cfDNA score (cfDNA%)
		15-1	40 mM EDTA-treated WU stored at RT for 3 days	4400	935	21.24		15-1	40 mM EDTA-treated US stored at RT for 3 days	1690	942	55.83		1-1	Baseline	2300	1350	58.68		1-1	Baseline	2300	1350	58.68
		15-2	40 mM EDTA-treated WU stored at RT for 3 days	2710	783	28.89		15-2	40 mM EDTA-treated US stored at RT for 3 days	1310	779	59.28		1-2	Baseline	2325	1400	60.19		1-2	Baseline	2325	1400	60.19
		15-3	40 mM EDTA-treated WU stored at RT for 3 days	5040	1230	24.36		15-3	40 mM EDTA-treated US stored at RT for 3 days	1430	905	63.47		1-3	Baseline	2050	1197.5	58.53		1-3	Baseline	2050	1197.5	58.53
														2-1	FWU thawed at 4℃ for 16 hours	866.25	620	71.66		13-1	10 mM EDTA-treated FWU thawed at 4℃ for 16 hours	1518.75	386.438	25.48
		Figure 1E,1H						Figure 2E,2H						2-2	FWU thawed at 4℃ for 16 hours	711.25	502.5	70.73		13-2	10 mM EDTA-treated FWU thawed at 4℃ for 16 hours	1250	482.5	38.51
		Sample ID	Groups	TDNA Yield (pg/mL)	ucfDNA Yield (pg/mL)	cfDNA score (cfDNA%)		Sample ID	Groups	TDNA Yield (pg/mL)	ucfDNA Yield (pg/mL)	cfDNA score (cfDNA%)		2-3	FWU thawed at 4℃ for 16 hours	623.75	428.75	68.8		13-3	10 mM EDTA-treated FWU thawed at 4℃ for 16 hours	1700	637.5	37.36
		1-1	Baseline	1790	1120	62.89		1-1	Baseline	2290	1450	63.33		5-1	FUS thawed at 4℃ for 16 hours	1923.75	1491.75	77.74		16-1	10 mM EDTA-treated FUS thawed at 4℃ for 16 hours	2162.5	1250	58.11
		1-2	Baseline	1710	1020	59.84		1-2	Baseline	2080	1360	65.45		5-2	FUS thawed at 4℃ for 16 hours	2000	1587.5	79.51		16-2	10 mM EDTA-treated FUS thawed at 4℃ for 16 hours	2100	1218.75	58.16
		1-3	Baseline	1850	1140	61.79		1-3	Baseline	2200	1440	65.36		5-3	FUS thawed at 4℃ for 16 hours	1850	1512.5	82.12		16-3	10 mM EDTA-treated FUS thawed at 4℃ for 16 hours	2187.5	1236.25	56.54
		7-1	5 mM EDTA-treated WU stored at RT for 7 days	5120	1560	30.41		7-1	5 mM EDTA-treated US stored at RT for 7 days	1460	1020	69.82		8-1	FUSS thawed at 4℃ for 16 hours	28.5	12.3125	43.12		19-1	10 mM EDTA-treated FUSS thawed at 4℃ for 16 hours	206.25	167.5	81.17
		7-2	5 mM EDTA-treated WU stored at RT for 7 days	3380	985	29.11		7-2	5 mM EDTA-treated US stored at RT for 7 days	1620	1140	70.55		8-2	FUSS thawed at 4℃ for 16 hours	40.375	26.125	64.76		19-2	10 mM EDTA-treated FUSS thawed at 4℃ for 16 hours	333.75	233.75	69.9
		7-3	5 mM EDTA-treated WU stored at RT for 7 days	3490	1050	30.07		7-3	5 mM EDTA-treated US stored at RT for 7 days	1530	1080	70.24		8-3	FUSS thawed at 4℃ for 16 hours	135	85.875	63.8		19-3	10 mM EDTA-treated FUSS thawed at 4℃ for 16 hours	538.75	376.25	69.76
		10-1	10 mM EDTA-treated WU stored at RT for 7 days	3240	1080	33.26		10-1	10 mM EDTA-treated US stored at RT for 7 days	2040	1320	64.61
		10-2	10 mM EDTA-treated WU stored at RT for 7 days	3730	1210	32.43		10-2	10 mM EDTA-treated US stored at RT for 7 days	2330	1470	63.12		Figure 3F						Figure 5E
		10-3	10 mM EDTA-treated WU stored at RT for 7 days	3370	1090	32.34		10-3	10 mM EDTA-treated US stored at RT for 7 days	2200	1340	61.05		Sample ID	Groups	TDNA Yield (pg/mL)	ucfDNA Yield (pg/mL)	cfDNA score (cfDNA%)		Sample ID	Groups	TDNA Yield (pg/mL)	ucfDNA Yield (pg/mL)	cfDNA score (cfDNA%)
		13-1	20 mM EDTA-treated WU stored at RT for 7 days	3400	747	21.95		13-1	20 mM EDTA-treated US stored at RT for 7 days	1710	1030	60.06		1-1	Baseline	2300	1350	58.68		1-1	Baseline	2300	1350	58.68
		13-2	20 mM EDTA-treated WU stored at RT for 7 days	4000	962	24.03		13-2	20 mM EDTA-treated US stored at RT for 7 days	1500	893	59.36		1-2	Baseline	2325	1400	60.19		1-2	Baseline	2325	1400	60.19
		13-3	20 mM EDTA-treated WU stored at RT for 7 days	4070	804	19.75		13-3	20 mM EDTA-treated US stored at RT for 7 days	1640	992	60.62		1-3	Baseline	2050	1197.5	58.53		1-3	Baseline	2050	1197.5	58.53
		16-1	40 mM EDTA-treated WU stored at RT for 7 days	2960	713	30.86		16-1	40 mM EDTA-treated US stored at RT for 7 days	1730	943	54.41		3-1	FWU thawed at RT (18–20℃) for 3.5 hours	1812.5	1487.5	82.47		14-1	10 mM EDTA-treated FWU thawed at RT (18–20℃) for 3.5 hours	5575	2137.5	38.38
		16-2	40 mM EDTA-treated WU stored at RT for 7 days	3190	722	22.63		16-2	40 mM EDTA-treated US stored at RT for 7 days	1560	883	56.5		3-2	FWU thawed at RT (18–20℃) for 3.5 hours	1712.5	1475	85.88		14-2	10 mM EDTA-treated FWU thawed at RT (18–20℃) for 3.5 hours	6362.5	2400	37.84
		16-3	40 mM EDTA-treated WU stored at RT for 7 days	2870	1020	35.42		16-3	40 mM EDTA-treated US stored at RT for 7 days	1970	1070	54.22		3-3	FWU thawed at RT (18–20℃) for 3.5 hours	1687.5	1412.5	84.07		14-3	10 mM EDTA-treated FWU thawed at RT (18–20℃) for 3.5 hours	5787.5	2162.5	37.47
														6-1	FUS thawed at RT (18–20℃) for 3.5 hours	2075	1625	78.7		17-1	10 mM EDTA-treated FUS thawed at RT (18–20℃) for 3.5 hours	2187.5	1312.5	60.16
														6-2	FUS thawed at RT (18–20℃) for 3.5 hours	1800	1537.5	85.19		17-2	10 mM EDTA-treated FUS thawed at RT (18–20℃) for 3.5 hours	2475	1487.5	60.24
														6-3	FUS thawed at RT (18–20℃) for 3.5 hours	2150	1687.5	78.39		17-3	10 mM EDTA-treated FUS thawed at RT (18–20℃) for 3.5 hours	1662.5	985	59.22
														9-1	FUSS thawed at RT (18–20℃) for 3.5 hours	272.5	168.75	62.04		20-1	10 mM EDTA-treated FUSS thawed at RT (18–20℃) for 3.5 hours	2087.5	1325	63.49
														9-2	FUSS thawed at RT (18–20℃) for 3.5 hours	368.75	333.75	90.59		20-2	10 mM EDTA-treated FUSS thawed at RT (18–20℃) for 3.5 hours	2137.5	1412.5	65.7
														9-3	FUSS thawed at RT (18–20℃) for 3.5 hours	242.5	213.75	88.22		20-3	10 mM EDTA-treated FUSS thawed at RT (18–20℃) for 3.5 hours	2025	1262.5	62.47
														Figure 3G						Figure 5F
														Sample ID	Groups	TDNA Yield (pg/mL)	ucfDNA Yield (pg/mL)	cfDNA score (cfDNA%)		Sample ID	Groups	TDNA Yield (pg/mL)	ucfDNA Yield (pg/mL)	cfDNA score (cfDNA%)
														1-1	Baseline	2300	1350	58.68		1-1	Baseline	2300	1350	58.68
														1-2	Baseline	2325	1400	60.19		1-2	Baseline	2325	1400	60.19
														1-3	Baseline	2050	1197.5	58.53		1-3	Baseline	2050	1197.5	58.53
														4-1	FWU thawed at 37℃ for approximately 15 minutes	2025	1562.5	77.31		15-1	10 mM EDTA-treated FWU thawed at 37℃ for approximately 15 minutes	5837.5	2187.5	37.46
														4-2	FWU thawed at 37℃ for approximately 15 minutes	1900	1462.5	77.34		15-2	10 mM EDTA-treated FWU thawed at 37℃ for approximately 15 minutes	7012.5	2612.5	37.33
														4-3	FWU thawed at 37℃ for approximately 15 minutes	1750	1335.94	76.27		15-3	10 mM EDTA-treated FWU thawed at 37℃ for approximately 15 minutes	9275	2400	25.85
														7-1	FUS thawed at 37℃ for approximately 15 minutes	1812.5	1350	74.27		18-1	10 mM EDTA-treated FUS thawed at 37℃ for approximately 15 minutes	2300	1350	58.8
														7-2	FUS thawed at 37℃ for approximately 15 minutes	2025	1550	76.38		18-2	10 mM EDTA-treated FUS thawed at 37℃ for approximately 15 minutes	2325	1400	60.44
														7-3	FUS thawed at 37℃ for approximately 15 minutes	2012.5	1462.5	72.8		18-3	10 mM EDTA-treated FUS thawed at 37℃ for approximately 15 minutes	2350	1400	59.98
														10-1	FUSS thawed at 37℃ for approximately 15 minutes	851.389	731.944	86.02		21-1	10 mM EDTA-treated FUSS thawed at 37℃ for approximately 15 minutes	2187.5	1337.5	61.51
														10-2	FUSS thawed at 37℃ for approximately 15 minutes	946.25	817.5	86.39		21-2	10 mM EDTA-treated FUSS thawed at 37℃ for approximately 15 minutes	2037.5	1275	62.81
														10-3	FUSS thawed at 37℃ for approximately 15 minutes	958.5	820.125	85.44		21-3	10 mM EDTA-treated FUSS thawed at 37℃ for approximately 15 minutes	1887.5	1176.25	62.27
	Source data of supplementary figures
		Figure S1A,S1B						Figure S2A,S2B
		Sample ID	Groups	TDNA Yield (pg/mL)	ucfDNA Yield (pg/mL)	cfDNA score (cfDNA%)		Sample ID	Groups	TDNA Yield (pg/mL)	ucfDNA Yield (pg/mL)	cfDNA score (cfDNA%)
		1-1	Baseline	1790	1120	62.89		1-1	Baseline	2300	1350	58.68
		1-2	Baseline	1710	1020	59.84		1-2	Baseline	2325	1400	60.19
		1-3	Baseline	1850	1140	61.79		1-3	Baseline	2050	1197.5	58.53
		5-1	5 mM EDTA-treated WU stored at RT for 1 day	1330	580	43.57		11-1	10 mM EDTA-treated WU stored at RT for 7 days	7500	2662.5	35.59
		5-2	5 mM EDTA-treated WU stored at RT for 1 day	1640	656	40.11		11-2	10 mM EDTA-treated WU stored at RT for 7 days	7487.5	2725	36.36
		5-3	5 mM EDTA-treated WU stored at RT for 1 day	1110	456	41.03		11-3	10 mM EDTA-treated WU stored at RT for 7 days	7137.5	2525	35.42
		6-1	5 mM EDTA-treated US stored at RT for 3 days	1970	1300	66.13		12-1	10 mM EDTA-treated US stored at RT for 7 days	2200	1325	60.09
		6-2	5 mM EDTA-treated US stored at RT for 3 days	1830	1280	70.16		12-2	10 mM EDTA-treated US stored at RT for 7 days	2275	1400	61.43
		6-3	5 mM EDTA-treated US stored at RT for 3 days	1880	1310	69.48		12-3	10 mM EDTA-treated US stored at RT for 7 days	2225	1350	60.27
		7-1	5 mM EDTA-treated WU stored at RT for 7 days	5120	1560	30.41
		7-2	5 mM EDTA-treated WU stored at RT for 7 days	3380	985	29.11		Figure S2C
		7-3	5 mM EDTA-treated WU stored at RT for 7 days	3490	1050	30.07		Sample ID	Groups	TDNA Yield (pg/mL)	ucfDNA Yield (pg/mL)	cfDNA score (cfDNA%)
		8-1	10 mM EDTA-treated WU stored at RT for 1 day	1500	619	41.21		11-1	10 mM EDTA-treated WU stored at RT for 7 days	7500	2662.5	35.59
		8-2	10 mM EDTA-treated WU stored at RT for 1 day	2290	880	38.37		11-2	10 mM EDTA-treated WU stored at RT for 7 days	7487.5	2725	36.36
		8-3	10 mM EDTA-treated WU stored at RT for 1 day	1560	541	34.68		11-3	10 mM EDTA-treated WU stored at RT for 7 days	7137.5	2525	35.42
		9-1	10 mM EDTA-treated WU stored at RT for 3 days	2580	889	34.46		13-1	10 mM EDTA-treated FWU thawed at 4℃ for 16 hours	1518.75	386.438	25.48
		9-2	10 mM EDTA-treated WU stored at RT for 3 days	3340	1150	34.42		13-2	10 mM EDTA-treated FWU thawed at 4℃ for 16 hours	1250	482.5	38.51
		9-3	10 mM EDTA-treated WU stored at RT for 3 days	2440	824	33.72		13-3	10 mM EDTA-treated FWU thawed at 4℃ for 16 hours	1700	637.5	37.36
		10-1	10 mM EDTA-treated WU stored at RT for 7 days	3240	1080	33.26		14-1	10 mM EDTA-treated FWU thawed at RT (18–20℃) for 3.5 hours	5575	2137.5	38.38
		10-2	10 mM EDTA-treated WU stored at RT for 7 days	3730	1210	32.43		14-2	10 mM EDTA-treated FWU thawed at RT (18–20℃) for 3.5 hours	6362.5	2400	37.84
		10-3	10 mM EDTA-treated WU stored at RT for 7 days	3370	1090	32.34		14-3	10 mM EDTA-treated FWU thawed at RT (18–20℃) for 3.5 hours	5787.5	2162.5	37.47
		11-1	20 mM EDTA-treated WU stored at RT for 1 day	2110	860	40.71		15-1	10 mM EDTA-treated FWU thawed at 37℃ for approximately 15 minutes	5837.5	2187.5	37.46
		11-2	20 mM EDTA-treated WU stored at RT for 1 day	1790	796	44.59		15-2	10 mM EDTA-treated FWU thawed at 37℃ for approximately 15 minutes	7012.5	2612.5	37.33
		11-3	20 mM EDTA-treated WU stored at RT for 1 day	1890	748	39.56		15-3	10 mM EDTA-treated FWU thawed at 37℃ for approximately 15 minutes	9275	2400	25.85
		12-1	20 mM EDTA-treated WU stored at RT for 3 days	3350	660	19.71
		12-2	20 mM EDTA-treated WU stored at RT for 3 days	3630	846	23.32		Figure S2D
		12-3	20 mM EDTA-treated WU stored at RT for 3 days	2880	739	25.69		Sample ID	Groups	TDNA Yield (pg/mL)	ucfDNA Yield (pg/mL)	cfDNA score (cfDNA%)
		13-1	20 mM EDTA-treated WU stored at RT for 7 days	3400	747	21.95		12-1	10 mM EDTA-treated US stored at RT for 7 days	2200	1325	60.09
		13-2	20 mM EDTA-treated WU stored at RT for 7 days	4000	962	24.03		12-2	10 mM EDTA-treated US stored at RT for 7 days	2275	1400	61.43
		13-3	20 mM EDTA-treated WU stored at RT for 7 days	4070	804	19.75		12-3	10 mM EDTA-treated US stored at RT for 7 days	2225	1350	60.27
		14-1	40 mM EDTA-treated WU stored at RT for 1 day	2580	1030	39.99		16-1	10 mM EDTA-treated FUS thawed at 4℃ for 16 hours	2162.5	1250	58.11
		14-2	40 mM EDTA-treated WU stored at RT for 1 day	3050	996	32.68		16-2	10 mM EDTA-treated FUS thawed at 4℃ for 16 hours	2100	1218.75	58.16
		14-3	40 mM EDTA-treated WU stored at RT for 1 day	2570	945	36.82		16-3	10 mM EDTA-treated FUS thawed at 4℃ for 16 hours	2187.5	1236.25	56.54
		15-1	40 mM EDTA-treated WU stored at RT for 3 days	4400	935	21.24		17-1	10 mM EDTA-treated FUS thawed at RT (18–20℃) for 3.5 hours	2187.5	1312.5	60.16
		15-2	40 mM EDTA-treated WU stored at RT for 3 days	2710	783	28.89		17-2	10 mM EDTA-treated FUS thawed at RT (18–20℃) for 3.5 hours	2475	1487.5	60.24
		15-3	40 mM EDTA-treated WU stored at RT for 3 days	5040	1230	24.36		17-3	10 mM EDTA-treated FUS thawed at RT (18–20℃) for 3.5 hours	1662.5	985	59.22
		16-1	40 mM EDTA-treated WU stored at RT for 7 days	2960	713	30.86		18-1	10 mM EDTA-treated FUS thawed at 37℃ for approximately 15 minutes	2300	1350	58.8
		16-2	40 mM EDTA-treated WU stored at RT for 7 days	3190	722	22.63		18-2	10 mM EDTA-treated FUS thawed at 37℃ for approximately 15 minutes	2325	1400	60.44
		16-3	40 mM EDTA-treated WU stored at RT for 7 days	2870	1020	35.42		18-3	10 mM EDTA-treated FUS thawed at 37℃ for approximately 15 minutes	2350	1400	59.98
	Abbreviations
			cfDNA → cell-free DNA
			ucfDNA → urinary cell-free DNA
			TDNA→Total DNA
			EDTA → ethylenediaminetetraacetic acid
			RT → room temperature
			WU → whole urine
			US → urine supernatant
			FUS → frozen urine supernatant
			FWU → frozen whole urine
			FUSS → FUS with postthawing secondary centrifugation
